# Supplementary material for: Clinical Characterization and Prognostic Value of TPM4 and Its Correlation with Epithelial–Mesenchymal Transition in Glioma
Source: MDPI journal article supplement (doi:10.3390/brainsci12091120), 2022-08-24
Supplement: s1 [file s1]

**Supplemental Table 4 Gene sets of EMT-related signaling pathways**

| <b>Pathway</b> | <b>GeneID</b> |
|----------------|---------------|
| TGFB           | TGFBR1        |
| TGFB           | SMAD7         |
| TGFB           | TGFB1         |
| TGFB           | SMURF2        |
| TGFB           | SMURF1        |
| TGFB           | BMPR2         |
| TGFB           | SKIL          |
| TGFB           | SKI           |
| TGFB           | ACVR1         |
| TGFB           | PMEPA1        |
| TGFB           | NCOR2         |
| TGFB           | SERPINE1      |
| TGFB           | JUNB          |
| TGFB           | SMAD1         |
| TGFB           | SMAD6         |
| TGFB           | PPP1R15A      |
| TGFB           | TGIF1         |
| TGFB           | FURIN         |
| TGFB           | SMAD3         |

|      |         |
|------|---------|
| TGFB | FKBP1A  |
| TGFB | MAP3K7  |
| TGFB | BMPR1A  |
| TGFB | CTNNB1  |
| TGFB | HIPK2   |
| TGFB | KLF10   |
| TGFB | BMP2    |
| TGFB | ENG     |
| TGFB | APC     |
| TGFB | PPM1A   |
| TGFB | XIAP    |
| TGFB | CDH1    |
| TGFB | ID1     |
| TGFB | LEFTY2  |
| TGFB | CDKN1C  |
| TGFB | TRIM33  |
| TGFB | RAB31   |
| TGFB | TJP1    |
| TGFB | SLC20A1 |
| TGFB | CDK9    |
| TGFB | ID3     |
| TGFB | NOG     |

|      |        |
|------|--------|
| TGFB | ARID4B |
| TGFB | IFNGR2 |
| TGFB | ID2    |
| TGFB | PPP1CA |
| TGFB | SPTBN1 |
| TGFB | WWTR1  |
| TGFB | BCAR3  |
| TGFB | THBS1  |
| TGFB | FNTA   |
| TGFB | HDAC1  |
| TGFB | UBE2D3 |
| TGFB | LTBP2  |
| TGFB | RHOA   |
| WNT  | MYC    |
| WNT  | CTNNB1 |
| WNT  | JAG2   |
| WNT  | NOTCH1 |
| WNT  | DLL1   |
| WNT  | AXIN2  |
| WNT  | PSEN2  |
| WNT  | FZD1   |
| WNT  | NOTCH4 |

|     |        |
|-----|--------|
| WNT | LEF1   |
| WNT | AXIN1  |
| WNT | NKD1   |
| WNT | WNT5B  |
| WNT | CUL1   |
| WNT | JAG1   |
| WNT | MAML1  |
| WNT | KAT2A  |
| WNT | GNAI1  |
| WNT | WNT6   |
| WNT | PTCH1  |
| WNT | NCOR2  |
| WNT | DKK4   |
| WNT | HDAC2  |
| WNT | DKK1   |
| WNT | TCF7   |
| WNT | WNT1   |
| WNT | NUMB   |
| WNT | ADAM17 |
| WNT | DVL2   |
| WNT | PPARD  |
| WNT | NCSTN  |

|          |        |
|----------|--------|
| WNT      | HDAC5  |
| WNT      | CCND2  |
| WNT      | FRAT1  |
| WNT      | CSNK1E |
| WNT      | RBPJ   |
| WNT      | FZD8   |
| WNT      | TP53   |
| WNT      | SKP2   |
| WNT      | HEY2   |
| WNT      | HEY1   |
| WNT      | HDAC11 |
| PI3K_AKT | MAPK8  |
| PI3K_AKT | PIK3R3 |
| PI3K_AKT | GRB2   |
| PI3K_AKT | NFKBIB |
| PI3K_AKT | MAP2K6 |
| PI3K_AKT | MAPK9  |
| PI3K_AKT | AKT1   |
| PI3K_AKT | MAPK1  |
| PI3K_AKT | PLCG1  |
| PI3K_AKT | TRIB3  |
| PI3K_AKT | GSK3B  |

|          |         |
|----------|---------|
| PI3K_AKT | MAP2K3  |
| PI3K_AKT | CDKN1A  |
| PI3K_AKT | RAC1    |
| PI3K_AKT | RIPK1   |
| PI3K_AKT | AKT1S1  |
| PI3K_AKT | ACTR2   |
| PI3K_AKT | PRKAR2A |
| PI3K_AKT | YWHAB   |
| PI3K_AKT | HRAS    |
| PI3K_AKT | PDK1    |
| PI3K_AKT | PIKFYVE |
| PI3K_AKT | TBK1    |
| PI3K_AKT | ACTR3   |
| PI3K_AKT | E2F1    |
| PI3K_AKT | MYD88   |
| PI3K_AKT | ITPR2   |
| PI3K_AKT | SQSTM1  |
| PI3K_AKT | RPS6KA1 |
| PI3K_AKT | PTPN11  |
| PI3K_AKT | MAPKAP1 |
| PI3K_AKT | PLCB1   |
| PI3K_AKT | RAF1    |

|          |            |
|----------|------------|
| PI3K_AKT | CAMK4      |
| PI3K_AKT | RPTOR      |
| PI3K_AKT | CFL1       |
| PI3K_AKT | CDK4       |
| PI3K_AKT | TRAF2      |
| PI3K_AKT | GNGT1      |
| PI3K_AKT | UBE2N      |
| PI3K_AKT | ADCY2      |
| PI3K_AKT | CDKN1B     |
| PI3K_AKT | VAV3       |
| PI3K_AKT | FGF6       |
| PI3K_AKT | ECSIT      |
| PI3K_AKT | RALB       |
| PI3K_AKT | ARF1       |
| PI3K_AKT | MKNK1      |
| PI3K_AKT | CDK1       |
| PI3K_AKT | PTEN       |
| PI3K_AKT | ARHGDIA    |
| PI3K_AKT | GRK2       |
| PI3K_AKT | FGF17      |
| PI3K_AKT | DDIT3      |
| PI3K_AKT | AC093012.1 |

|          |          |
|----------|----------|
| PI3K_AKT | TIAM1    |
| PI3K_AKT | CDK2     |
| PI3K_AKT | SFN      |
| PI3K_AKT | PRKCB    |
| PI3K_AKT | GNA14    |
| PI3K_AKT | EIF4E    |
| PI3K_AKT | CLTC     |
| PI3K_AKT | TSC2     |
| PI3K_AKT | FGF22    |
| PI3K_AKT | PPP1CA   |
| PI3K_AKT | DUSP3    |
| PI3K_AKT | HSP90B1  |
| PI3K_AKT | IL4      |
| PI3K_AKT | STAT2    |
| PI3K_AKT | SLA      |
| PI3K_AKT | EGFR     |
| PI3K_AKT | PLA2G12A |
| PI3K_AKT | MAPK10   |
| PI3K_AKT | CALR     |
| PI3K_AKT | THEM4    |
| PI3K_AKT | RIT1     |
| PI3K_AKT | MKNK2    |



|          |          |
|----------|----------|
| PI3K_AKT | PPP2R1B  |
| PI3K_AKT | CAB39L   |
| PI3K_AKT | ARPC3    |
| PI3K_AKT | PITX2    |
| PI3K_AKT | NCK1     |
| PI3K_AKT | IL2RG    |
| PI3K_AKT | PFN1     |
| PI3K_AKT | FASLG    |
| PI3K_AKT | NOD1     |
| PI3K_AKT | DAPP1    |
| PI3K_AKT | UBE2D3   |
| PI3K_AKT | CAB39    |
| PI3K_AKT | AP2M1    |
| PI3K_AKT | MAP3K7   |
| PI3K_AKT | PRKAG1   |
| PI3K_AKT | CSNK2B   |
| PI3K_AKT | PRKAA2   |
| PI3K_AKT | ATF1     |
| PI3K_AKT | SLC2A1   |
| PI3K_AKT | PIN1     |
| PI3K_AKT | TNFRSF1A |
| PI3K_AKT | LCK      |

|          |         |
|----------|---------|
| PI3K_AKT | RPS6KA3 |
| PI3K_AKT | NGF     |
| PI3K_AKT | CXCR4   |
| PI3K_AKT | ACACA   |
| PI3K_AKT | SMAD2   |
| PI3K_AKT | PAK4    |
| MAPK     | AKT1    |
| MAPK     | AKT2    |
| MAPK     | AKT3    |
| MAPK     | ARRB1   |
| MAPK     | ARRB2   |
| MAPK     | ATF2    |
| MAPK     | ATF4    |
| MAPK     | BDNF    |
| MAPK     | BRAF    |
| MAPK     | CACNA1A |
| MAPK     | CACNA1B |
| MAPK     | CACNA1C |
| MAPK     | CACNA1D |
| MAPK     | CACNA1E |
| MAPK     | CACNA1F |
| MAPK     | CACNA1G |

|      |          |
|------|----------|
| MAPK | CACNA1H  |
| MAPK | CACNA1I  |
| MAPK | CACNA1S  |
| MAPK | CACNA2D1 |
| MAPK | CACNA2D2 |
| MAPK | CACNA2D3 |
| MAPK | CACNA2D4 |
| MAPK | CACNB1   |
| MAPK | CACNB2   |
| MAPK | CACNB3   |
| MAPK | CACNB4   |
| MAPK | CACNG1   |
| MAPK | CACNG2   |
| MAPK | CACNG3   |
| MAPK | CACNG4   |
| MAPK | CACNG5   |
| MAPK | CACNG6   |
| MAPK | CACNG7   |
| MAPK | CACNG8   |
| MAPK | CASP3    |
| MAPK | CD14     |
| MAPK | CDC25B   |

|      |        |
|------|--------|
| MAPK | CDC42  |
| MAPK | CHP1   |
| MAPK | CHP2   |
| MAPK | CHUK   |
| MAPK | CRK    |
| MAPK | CRKL   |
| MAPK | DAXX   |
| MAPK | DDIT3  |
| MAPK | DUSP1  |
| MAPK | DUSP10 |
| MAPK | DUSP14 |
| MAPK | DUSP16 |
| MAPK | DUSP2  |
| MAPK | DUSP3  |
| MAPK | DUSP4  |
| MAPK | DUSP5  |
| MAPK | DUSP6  |
| MAPK | DUSP7  |
| MAPK | DUSP8  |
| MAPK | DUSP9  |
| MAPK | ECSIT  |
| MAPK | EGF    |

|      |       |
|------|-------|
| MAPK | EGFR  |
| MAPK | ELK1  |
| MAPK | ELK4  |
| MAPK | FAS   |
| MAPK | FASLG |
| MAPK | FGF1  |
| MAPK | FGF10 |
| MAPK | FGF11 |
| MAPK | FGF12 |
| MAPK | FGF13 |
| MAPK | FGF14 |
| MAPK | FGF16 |
| MAPK | FGF17 |
| MAPK | FGF18 |
| MAPK | FGF19 |
| MAPK | FGF2  |
| MAPK | FGF20 |
| MAPK | FGF21 |
| MAPK | FGF22 |
| MAPK | FGF23 |
| MAPK | FGF3  |
| MAPK | FGF4  |

|      |         |
|------|---------|
| MAPK | FGF5    |
| MAPK | FGF6    |
| MAPK | FGF7    |
| MAPK | FGF8    |
| MAPK | FGF9    |
| MAPK | FGFR1   |
| MAPK | FGFR2   |
| MAPK | FGFR3   |
| MAPK | FGFR4   |
| MAPK | FLNA    |
| MAPK | FLNB    |
| MAPK | FLNC    |
| MAPK | FOS     |
| MAPK | GADD45A |
| MAPK | GADD45B |
| MAPK | GADD45G |
| MAPK | GNA12   |
| MAPK | GNG12   |
| MAPK | GRB2    |
| MAPK | HRAS    |
| MAPK | HSPA1A  |
| MAPK | HSPA1B  |

|      |               |
|------|---------------|
| MAPK | HSPA1L        |
| MAPK | HSPA2         |
| MAPK | HSPA6         |
| MAPK | HSPA8         |
| MAPK | HSPB1         |
| MAPK | IKBKB         |
| MAPK | IKBKG         |
| MAPK | IL1A          |
| MAPK | IL1B          |
| MAPK | IL1R1         |
| MAPK | IL1R2         |
| MAPK | JMJD7-PLA2G4B |
| MAPK | JUN           |
| MAPK | JUND          |
| MAPK | KRAS          |
| MAPK | LAMTOR3       |
| MAPK | MAP2K1        |
| MAPK | MAP2K2        |
| MAPK | MAP2K3        |
| MAPK | MAP2K4        |
| MAPK | MAP2K5        |
| MAPK | MAP2K6        |

|      |         |
|------|---------|
| MAPK | MAP2K7  |
| MAPK | MAP3K1  |
| MAPK | MAP3K11 |
| MAPK | MAP3K12 |
| MAPK | MAP3K13 |
| MAPK | MAP3K14 |
| MAPK | MAP3K2  |
| MAPK | MAP3K20 |
| MAPK | MAP3K3  |
| MAPK | MAP3K4  |
| MAPK | MAP3K5  |
| MAPK | MAP3K6  |
| MAPK | MAP3K7  |
| MAPK | MAP3K8  |
| MAPK | MAP4K1  |
| MAPK | MAP4K2  |
| MAPK | MAP4K3  |
| MAPK | MAP4K4  |
| MAPK | MAPK1   |
| MAPK | MAPK10  |
| MAPK | MAPK11  |
| MAPK | MAPK12  |



|      |          |
|------|----------|
| MAPK | MAPK13   |
| MAPK | MAPK14   |
| MAPK | MAPK3    |
| MAPK | MAPK7    |
| MAPK | MAPK8    |
| MAPK | MAPK8IP1 |
| MAPK | MAPK8IP2 |
| MAPK | MAPK8IP3 |
| MAPK | MAPK9    |
| MAPK | MAPKAPK2 |
| MAPK | MAPKAPK3 |
| MAPK | MAPKAPK5 |
| MAPK | MAPT     |
| MAPK | MAX      |
| MAPK | MECOM    |
| MAPK | MEF2C    |
| MAPK | MKNK1    |
| MAPK | MKNK2    |
| MAPK | MOS      |
| MAPK | MRAS     |
| MAPK | MYC      |
| MAPK | NF1      |

|      |          |
|------|----------|
| MAPK | NFATC2   |
| MAPK | NFATC4   |
| MAPK | NFKB1    |
| MAPK | NFKB2    |
| MAPK | NGF      |
| MAPK | NLK      |
| MAPK | NR4A1    |
| MAPK | NRAS     |
| MAPK | NTF3     |
| MAPK | NTF4     |
| MAPK | NTRK1    |
| MAPK | NTRK2    |
| MAPK | PAK1     |
| MAPK | PAK2     |
| MAPK | PDGFA    |
| MAPK | PDGFB    |
| MAPK | PDGFRA   |
| MAPK | PDGFRB   |
| MAPK | PLA2G10  |
| MAPK | PLA2G12A |
| MAPK | PLA2G12B |
| MAPK | PLA2G1B  |

|      |         |
|------|---------|
| MAPK | PLA2G2A |
| MAPK | PLA2G2C |
| MAPK | PLA2G2D |
| MAPK | PLA2G2E |
| MAPK | PLA2G2F |
| MAPK | PLA2G3  |
| MAPK | PLA2G4A |
| MAPK | PLA2G4B |
| MAPK | PLA2G4E |
| MAPK | PLA2G5  |
| MAPK | PLA2G6  |
| MAPK | PPM1A   |
| MAPK | PPM1B   |
| MAPK | PPP3CA  |
| MAPK | PPP3CB  |
| MAPK | PPP3CC  |
| MAPK | PPP3R1  |
| MAPK | PPP3R2  |
| MAPK | PPP5C   |
| MAPK | PRKACA  |
| MAPK | PRKACB  |
| MAPK | PRKACG  |

|      |         |
|------|---------|
| MAPK | PRKCA   |
| MAPK | PRKCB   |
| MAPK | PRKCG   |
| MAPK | PRKX    |
| MAPK | PTPN5   |
| MAPK | PTPN7   |
| MAPK | PTPRR   |
| MAPK | RAC1    |
| MAPK | RAC2    |
| MAPK | RAC3    |
| MAPK | RAF1    |
| MAPK | RAP1A   |
| MAPK | RAP1B   |
| MAPK | RAPGEF2 |
| MAPK | RASA1   |
| MAPK | RASA2   |
| MAPK | RASGRF1 |
| MAPK | RASGRF2 |
| MAPK | RASGRP1 |
| MAPK | RASGRP2 |
| MAPK | RASGRP3 |
| MAPK | RASGRP4 |

|      |         |
|------|---------|
| MAPK | RELA    |
| MAPK | RELB    |
| MAPK | RPS6KA1 |
| MAPK | RPS6KA2 |
| MAPK | RPS6KA3 |
| MAPK | RPS6KA4 |
| MAPK | RPS6KA5 |
| MAPK | RPS6KA6 |
| MAPK | RRAS    |
| MAPK | RRAS2   |
| MAPK | SOS1    |
| MAPK | SOS2    |
| MAPK | SRF     |
| MAPK | STK3    |
| MAPK | STK4    |
| MAPK | STMN1   |
| MAPK | TAB1    |
| MAPK | TAB2    |
| MAPK | TAOK1   |
| MAPK | TAOK2   |
| MAPK | TAOK3   |
| MAPK | TGFB1   |

|       |          |
|-------|----------|
| MAPK  | TGFB2    |
| MAPK  | TGFB3    |
| MAPK  | TGFBR1   |
| MAPK  | TGFBR2   |
| MAPK  | TNF      |
| MAPK  | TNFRSF1A |
| MAPK  | TP53     |
| MAPK  | TRAF2    |
| MAPK  | TRAF6    |
| Notch | JAG1     |
| Notch | NOTCH3   |
| Notch | NOTCH2   |
| Notch | APH1A    |
| Notch | HES1     |
| Notch | CCND1    |
| Notch | FZD1     |
| Notch | PSEN2    |
| Notch | FZD7     |
| Notch | DTX1     |
| Notch | DLL1     |
| Notch | FZD5     |
| Notch | MAML2    |

|          |         |
|----------|---------|
| Notch    | NOTCH1  |
| Notch    | PSENEN  |
| Notch    | WNT5A   |
| Notch    | CUL1    |
| Notch    | WNT2    |
| Notch    | DTX4    |
| Notch    | SAP30   |
| Notch    | PPARD   |
| Notch    | KAT2A   |
| Notch    | HEYL    |
| Notch    | SKP1    |
| Notch    | RBX1    |
| Notch    | TCF7L2  |
| Notch    | ARRB1   |
| Notch    | LFNG    |
| Notch    | PRKCA   |
| Notch    | DTX2    |
| Notch    | ST3GAL6 |
| Notch    | FBXW11  |
| Hedgehog | SHH     |
| Hedgehog | PTCH1   |
| Hedgehog | NRCAM   |

|          |        |
|----------|--------|
| Hedgehog | NRP1   |
| Hedgehog | SCG2   |
| Hedgehog | AMOT   |
| Hedgehog | UNC5C  |
| Hedgehog | ADGRG1 |
| Hedgehog | HEY1   |
| Hedgehog | GLI1   |
| Hedgehog | THY1   |
| Hedgehog | SLIT1  |
| Hedgehog | CDK6   |
| Hedgehog | HEY2   |
| Hedgehog | NRP2   |
| Hedgehog | TLE3   |
| Hedgehog | TLE1   |
| Hedgehog | L1CAM  |
| Hedgehog | PLG    |
| Hedgehog | NKX6-1 |
| Hedgehog | NF1    |
| Hedgehog | RASA1  |
| Hedgehog | ETS2   |
| Hedgehog | RTN1   |
| Hedgehog | CRMP1  |



|          |        |
|----------|--------|
| Hedgehog | MYH9   |
| Hedgehog | VEGFA  |
| Hedgehog | CELSR1 |
| Hedgehog | CNTFR  |
| Hedgehog | ACHE   |
| Hedgehog | PML    |
| Hedgehog | CDK5R1 |
| Hedgehog | VLDLR  |
| Hedgehog | OPHN1  |
| Hedgehog | LDB1   |
| Hedgehog | DPYSL2 |
| Hypoxia  | PGK1   |
| Hypoxia  | PDK1   |
| Hypoxia  | GBE1   |
| Hypoxia  | PFKL   |
| Hypoxia  | ALDOA  |
| Hypoxia  | ENO2   |
| Hypoxia  | PGM1   |
| Hypoxia  | NDRG1  |
| Hypoxia  | HK2    |
| Hypoxia  | ALDOC  |
| Hypoxia  | GPI    |

|         |         |
|---------|---------|
| Hypoxia | MXI1    |
| Hypoxia | SLC2A1  |
| Hypoxia | P4HA1   |
| Hypoxia | ADM     |
| Hypoxia | P4HA2   |
| Hypoxia | ENO1    |
| Hypoxia | PFKP    |
| Hypoxia | AK4     |
| Hypoxia | FAM162A |
| Hypoxia | PFKFB3  |
| Hypoxia | VEGFA   |
| Hypoxia | BNIP3L  |
| Hypoxia | TPI1    |
| Hypoxia | ERO1A   |
| Hypoxia | KDM3A   |
| Hypoxia | CCNG2   |
| Hypoxia | LDHA    |
| Hypoxia | GYS1    |
| Hypoxia | GAPDH   |
| Hypoxia | BHLHE40 |
| Hypoxia | ANGPTL4 |
| Hypoxia | JUN     |

|         |          |
|---------|----------|
| Hypoxia | SERPINE1 |
| Hypoxia | LOX      |
| Hypoxia | GCK      |
| Hypoxia | PPFIA4   |
| Hypoxia | MAFF     |
| Hypoxia | DDIT4    |
| Hypoxia | SLC2A3   |
| Hypoxia | IGFBP3   |
| Hypoxia | NFIL3    |
| Hypoxia | FOS      |
| Hypoxia | RBPJ     |
| Hypoxia | HK1      |
| Hypoxia | CITED2   |
| Hypoxia | ISG20    |
| Hypoxia | GALK1    |
| Hypoxia | WSB1     |
| Hypoxia | PYGM     |
| Hypoxia | STC1     |
| Hypoxia | ZNF292   |
| Hypoxia | BTG1     |
| Hypoxia | PLIN2    |
| Hypoxia | CSRP2    |

|         |         |
|---------|---------|
| Hypoxia | VLDLR   |
| Hypoxia | JMJD6   |
| Hypoxia | EXT1    |
| Hypoxia | F3      |
| Hypoxia | PDK3    |
| Hypoxia | ANKZF1  |
| Hypoxia | UGP2    |
| Hypoxia | ALDOB   |
| Hypoxia | STC2    |
| Hypoxia | ERRFI1  |
| Hypoxia | ENO3    |
| Hypoxia | PNRC1   |
| Hypoxia | HMOX1   |
| Hypoxia | PGF     |
| Hypoxia | GAPDHS  |
| Hypoxia | CHST2   |
| Hypoxia | TMEM45A |
| Hypoxia | BCAN    |
| Hypoxia | ATF3    |
| Hypoxia | CAV1    |
| Hypoxia | AMPD3   |
| Hypoxia | GPC3    |

|         |        |
|---------|--------|
| Hypoxia | NDST1  |
| Hypoxia | IRS2   |
| Hypoxia | SAP30  |
| Hypoxia | GAA    |
| Hypoxia | SDC4   |
| Hypoxia | STBD1  |
| Hypoxia | IER3   |
| Hypoxia | PKLR   |
| Hypoxia | IGFBP1 |
| Hypoxia | PLAUR  |
| Hypoxia | CAVIN3 |
| Hypoxia | CCN5   |
| Hypoxia | LARGE1 |
| Hypoxia | NOCT   |
| Hypoxia | S100A4 |
| Hypoxia | RRAGD  |
| Hypoxia | ZFP36  |
| Hypoxia | EGFR   |
| Hypoxia | EDN2   |
| Hypoxia | IDS    |
| Hypoxia | CDKN1A |
| Hypoxia | RORA   |

|         |          |
|---------|----------|
| Hypoxia | DUSP1    |
| Hypoxia | MIF      |
| Hypoxia | PPP1R3C  |
| Hypoxia | DPYSL4   |
| Hypoxia | KDEL3    |
| Hypoxia | DTNA     |
| Hypoxia | ADORA2B  |
| Hypoxia | HS3ST1   |
| Hypoxia | CAVIN1   |
| Hypoxia | NR3C1    |
| Hypoxia | KLF6     |
| Hypoxia | GPC4     |
| Hypoxia | CCN1     |
| Hypoxia | TNFAIP3  |
| Hypoxia | CA12     |
| Hypoxia | HEXA     |
| Hypoxia | BGN      |
| Hypoxia | PPP1R15A |
| Hypoxia | PGM2     |
| Hypoxia | PIM1     |
| Hypoxia | PRDX5    |
| Hypoxia | NAGK     |

|         |         |
|---------|---------|
| Hypoxia | CDKN1B  |
| Hypoxia | BRS3    |
| Hypoxia | TKTL1   |
| Hypoxia | MT1E    |
| Hypoxia | ATP7A   |
| Hypoxia | MT2A    |
| Hypoxia | SDC3    |
| Hypoxia | TIPARP  |
| Hypoxia | PKP1    |
| Hypoxia | ANXA2   |
| Hypoxia | PGAM2   |
| Hypoxia | DDIT3   |
| Hypoxia | PRKCA   |
| Hypoxia | SLC37A4 |
| Hypoxia | CXCR4   |
| Hypoxia | EFNA3   |
| Hypoxia | CP      |
| Hypoxia | KLF7    |
| Hypoxia | CCN2    |
| Hypoxia | CHST3   |
| Hypoxia | TPD52   |
| Hypoxia | LXN     |

|         |          |
|---------|----------|
| Hypoxia | B4GALNT2 |
| Hypoxia | PPARGC1A |
| Hypoxia | BCL2     |
| Hypoxia | GCNT2    |
| Hypoxia | HAS1     |
| Hypoxia | KLHL24   |
| Hypoxia | SCARB1   |
| Hypoxia | SLC25A1  |
| Hypoxia | SDC2     |
| Hypoxia | CASP6    |
| Hypoxia | VHL      |
| Hypoxia | FOXO3    |
| Hypoxia | PDGFB    |
| Hypoxia | B3GALT6  |
| Hypoxia | SLC2A5   |
| Hypoxia | SRPX     |
| Hypoxia | EFNA1    |
| Hypoxia | GLRX     |
| Hypoxia | ACKR3    |
| Hypoxia | PAM      |
| Hypoxia | TGFBI    |
| Hypoxia | DCN      |



|         |         |
|---------|---------|
| Hypoxia | SIAH2   |
| Hypoxia | PLAC8   |
| Hypoxia | FBP1    |
| Hypoxia | TPST2   |
| Hypoxia | PHKG1   |
| Hypoxia | MYH9    |
| Hypoxia | CDKN1C  |
| Hypoxia | GRHPR   |
| Hypoxia | PCK1    |
| Hypoxia | INHA    |
| Hypoxia | HSPA5   |
| Hypoxia | NDST2   |
| Hypoxia | NEDD4L  |
| Hypoxia | TPBG    |
| Hypoxia | XPNPEP1 |
| Hypoxia | IL6     |
| Hypoxia | SLC6A6  |
| Hypoxia | MAP3K1  |
| Hypoxia | LDHC    |
| Hypoxia | AKAP12  |
| Hypoxia | TES     |
| Hypoxia | KIF5A   |

|         |          |
|---------|----------|
| Hypoxia | LALBA    |
| Hypoxia | COL5A1   |
| Hypoxia | GPC1     |
| Hypoxia | HDLBP    |
| Hypoxia | ILVBL    |
| Hypoxia | NCAN     |
| Hypoxia | TGM2     |
| Hypoxia | ETS1     |
| Hypoxia | HOXB9    |
| Hypoxia | SELENBP1 |
| Hypoxia | FOSL2    |
| Hypoxia | SULT2B1  |
| Hypoxia | TGFB3    |
