# Supplementary material for: Clinical Characterization and Prognostic Value of TPM4 and Its Correlation with Epithelial–Mesenchymal Transition in Glioma
Source: MDPI journal article supplement (doi:10.3390/brainsci12091120), 2022-08-24
Supplement: s1 [file s1]

**Supplemental Table 3 Gene list for TPM4-significantly-correlated genes that overlap between CGGA and TCGA **GBM****

| <b>No.</b> | <b>Gene name</b> |
|------------|------------------|
| 1          | ACOT9            |
| 2          | ACTA2            |
| 3          | ACTN1            |
| 4          | ADAM9            |
| 5          | ADAMTS1          |
| 6          | ARID5A           |
| 7          | ARPC5            |
| 8          | BACE2            |
| 9          | BCL3             |
| 10         | BGN              |
| 11         | C1QTNF6          |
| 12         | CALD1            |
| 13         | CCDC102B         |
| 14         | CD248            |
| 15         | CD276            |
| 16         | CD93             |
| 17         | CHPF2            |
| 18         | CLIC1            |
| 19         | CNN2             |

|    |         |
|----|---------|
| 20 | COL12A1 |
| 21 | COL18A1 |
| 22 | COL4A1  |
| 23 | COL4A2  |
| 24 | COL5A1  |
| 25 | COL5A2  |
| 26 | COL6A1  |
| 27 | COL6A2  |
| 28 | DCBLD2  |
| 29 | EIF4E2  |
| 30 | ETV6    |
| 31 | FAM20C  |
| 32 | FBLIM1  |
| 33 | FN1     |
| 34 | FNDC3B  |
| 35 | FOSL2   |
| 36 | HIC1    |
| 37 | HSPG2   |
| 38 | IER5L   |
| 39 | IGFBP4  |
| 40 | IKBIP   |
| 41 | ITGA1   |

|    |        |
|----|--------|
| 42 | ITGA5  |
| 43 | ITGB1  |
| 44 | ITGB3  |
| 45 | LAMA4  |
| 46 | LAMB1  |
| 47 | LAMC1  |
| 48 | LDHA   |
| 49 | LMAN1  |
| 50 | LMNA   |
| 51 | LOXL1  |
| 52 | LOXL2  |
| 53 | LRRC32 |
| 54 | MAFF   |
| 55 | MAP2K3 |
| 56 | MCAM   |
| 57 | METRNL |
| 58 | MMP14  |
| 59 | MPZL2  |
| 60 | MYH9   |
| 61 | MYL12A |
| 62 | MYL9   |
| 63 | MYOF   |

|    |          |
|----|----------|
| 64 | NOX4     |
| 65 | NRP1     |
| 66 | P4HA2    |
| 67 | PDGFRB   |
| 68 | PDIA3    |
| 69 | PDLIM7   |
| 70 | PLAU     |
| 71 | PLAUR    |
| 72 | PPP1R3B  |
| 73 | PRR16    |
| 74 | RAB27A   |
| 75 | RAI14    |
| 76 | RBMS1    |
| 77 | RCN3     |
| 78 | RUNX1    |
| 79 | SBNO2    |
| 80 | SERPINB8 |
| 81 | SERPINH1 |
| 82 | TAGLN    |
| 83 | TGFB1I1  |
| 84 | TGFBI    |
| 85 | THBD     |

|    |        |
|----|--------|
| 86 | THBS1  |
| 87 | TPM2   |
| 88 | TPM4   |
| 89 | UACA   |
| 90 | UBE3C  |
| 91 | VASP   |
| 92 | VCL    |
| 93 | VIM    |
| 94 | WWTR1  |
| 95 | ZDHHC5 |
