# Supplementary material for: Clinical Characterization and Prognostic Value of TPM4 and Its Correlation with Epithelial–Mesenchymal Transition in Glioma
Source: MDPI journal article supplement (doi:10.3390/brainsci12091120), 2022-08-24
Supplement: s1 [file s1]

**Supplemental Table 2 Gene list for TPM4-significantly-correlated genes that overlap between CGGA and TCGA **pan-glioma**.**

| No. | Gene name |
|-----|-----------|
| 1   | ABCC3     |
| 2   | ACTA2     |
| 3   | ACTG2     |
| 4   | ACTN1     |
| 5   | ADAM12    |
| 6   | ADAM19    |
| 7   | ADAM9     |
| 8   | ADAMTS1   |
| 9   | ADM       |
| 10  | ADPGK     |
| 11  | AFAP1L1   |
| 12  | AK2       |
| 13  | ANGPT2    |
| 14  | ANPEP     |
| 15  | ANXA1     |
| 16  | ANXA2     |
| 17  | ARAP3     |
| 18  | ARHGAP11A |
| 19  | ARL4C     |

|    |          |
|----|----------|
| 20 | ARPC2    |
| 21 | ARPC5    |
| 22 | ASPM     |
| 23 | ASPN     |
| 24 | ATF3     |
| 25 | ATF5     |
| 26 | AURKA    |
| 27 | BACE2    |
| 28 | BCAT1    |
| 29 | BCL10    |
| 30 | BCL3     |
| 31 | BDKRB2   |
| 32 | BGN      |
| 33 | BST1     |
| 34 | BUB1     |
| 35 | C11orf24 |
| 36 | C15orf48 |
| 37 | C1QTNF6  |
| 38 | C1R      |
| 39 | C1RL     |
| 40 | CA9      |
| 41 | CALD1    |

|    |        |
|----|--------|
| 42 | CALU   |
| 43 | CANT1  |
| 44 | CAPZA1 |
| 45 | CASP4  |
| 46 | CASP6  |
| 47 | CASP8  |
| 48 | CAV1   |
| 49 | CCNB1  |
| 50 | CCNB2  |
| 51 | CD248  |
| 52 | CD276  |
| 53 | CD58   |
| 54 | CD63   |
| 55 | CD93   |
| 56 | CDC6   |
| 57 | CDCA2  |
| 58 | CDCA8  |
| 59 | CDKN3  |
| 60 | CENPN  |
| 61 | CEP55  |
| 62 | CFI    |
| 63 | CHEK2  |

|    |         |
|----|---------|
| 64 | CHI3L1  |
| 65 | CHPF2   |
| 66 | CHRNA9  |
| 67 | CHSY1   |
| 68 | CKAP4   |
| 69 | CLCF1   |
| 70 | CLIC1   |
| 71 | CLIC4   |
| 72 | CLSPN   |
| 73 | CNIH4   |
| 74 | COL18A1 |
| 75 | COL1A1  |
| 76 | COL1A2  |
| 77 | COL3A1  |
| 78 | COL4A1  |
| 79 | COL4A2  |
| 80 | COL5A1  |
| 81 | COL5A2  |
| 82 | COL6A1  |
| 83 | COL6A2  |
| 84 | COL8A1  |
| 85 | CTHRC1  |

|     |         |
|-----|---------|
| 86  | CTSB    |
| 87  | CTSC    |
| 88  | DCBLD2  |
| 89  | DEPDC1  |
| 90  | DLGAP5  |
| 91  | DNAJB1  |
| 92  | DNAJB11 |
| 93  | DPYD    |
| 94  | DUSP5   |
| 95  | DUSP6   |
| 96  | DYRK3   |
| 97  | E2F7    |
| 98  | E2F8    |
| 99  | ECE1    |
| 100 | ECSCR   |
| 101 | EFNB2   |
| 102 | EHD2    |
| 103 | EHD4    |
| 104 | ELF4    |
| 105 | EMILIN1 |
| 106 | EMILIN2 |
| 107 | EMP3    |

|     |          |
|-----|----------|
| 108 | ENG      |
| 109 | ENPEP    |
| 110 | EPHA2    |
| 111 | ESM1     |
| 112 | ETV6     |
| 113 | FAM114A1 |
| 114 | FAM126A  |
| 115 | FAM20A   |
| 116 | FAM20C   |
| 117 | FBLIM1   |
| 118 | FCGR2A   |
| 119 | FCGR3A   |
| 120 | FILIP1L  |
| 121 | FKBP9    |
| 122 | FLNA     |
| 123 | FN1      |
| 124 | FNDC3B   |
| 125 | FOSL1    |
| 126 | FOSL2    |
| 127 | FSTL1    |
| 128 | GADD45A  |
| 129 | GAS2L3   |

|     |           |
|-----|-----------|
| 130 | GBP1      |
| 131 | GDF15     |
| 132 | GJC1      |
| 133 | GLA       |
| 134 | GLIPR1    |
| 135 | GNG5      |
| 136 | GNS       |
| 137 | GPR4      |
| 138 | GPX8      |
| 139 | GUSB      |
| 140 | HEXB      |
| 141 | HIST1H2BH |
| 142 | HJURP     |
| 143 | HK3       |
| 144 | HSPA6     |
| 145 | HSPG2     |
| 146 | HTRA3     |
| 147 | IBSP      |
| 148 | ICAM1     |
| 149 | IER5L     |
| 150 | IFI30     |
| 151 | IFNGR2    |

|     |          |
|-----|----------|
| 152 | IGF2BP3  |
| 153 | IGFBP2   |
| 154 | IGFBP4   |
| 155 | IKBIP    |
| 156 | IL1RAP   |
| 157 | IL2RA    |
| 158 | IQGAP1   |
| 159 | IQGAP2   |
| 160 | ISG20    |
| 161 | ITGA1    |
| 162 | ITGA4    |
| 163 | ITGA5    |
| 164 | ITGB1    |
| 165 | ITGB3    |
| 166 | ITPRIPL1 |
| 167 | JAG1     |
| 168 | KCNE3    |
| 169 | KDELRL1  |
| 170 | KDELRL2  |
| 171 | KDELRL3  |
| 172 | KIF20A   |
| 173 | KIF23    |



|     |         |
|-----|---------|
| 174 | KLF6    |
| 175 | KYNU    |
| 176 | LAMB1   |
| 177 | LAMC1   |
| 178 | LAMC3   |
| 179 | LATS2   |
| 180 | LDHA    |
| 181 | LGALS1  |
| 182 | LGALS3  |
| 183 | LOX     |
| 184 | LOXL1   |
| 185 | LOXL2   |
| 186 | LRRC32  |
| 187 | LSP1    |
| 188 | LUM     |
| 189 | LXN     |
| 190 | LYZ     |
| 191 | MANF    |
| 192 | MAP2K3  |
| 193 | MCAM    |
| 194 | METTL7B |
| 195 | MGP     |

|     |          |
|-----|----------|
| 196 | MIR155HG |
| 197 | MMP11    |
| 198 | MMP14    |
| 199 | MMP19    |
| 200 | MMP9     |
| 201 | MPZL2    |
| 202 | MPZL3    |
| 203 | MSN      |
| 204 | MSR1     |
| 205 | MXRA5    |
| 206 | MYL12A   |
| 207 | MYL12B   |
| 208 | MYL6     |
| 209 | MYO1B    |
| 210 | MYO1G    |
| 211 | MYOF     |
| 212 | NAMPT    |
| 213 | NCAPG    |
| 214 | NDUFA4L2 |
| 215 | NEK6     |
| 216 | NFKBIZ   |
| 217 | NID2     |

|     |         |
|-----|---------|
| 218 | NIP7    |
| 219 | NNMT    |
| 220 | NOX4    |
| 221 | NRP1    |
| 222 | NTAN1   |
| 223 | OLFML2A |
| 224 | OSMR    |
| 225 | OSTC    |
| 226 | P4HA3   |
| 227 | PCOLCE  |
| 228 | PDIA3   |
| 229 | PDIA5   |
| 230 | PDLIM1  |
| 231 | PDLIM7  |
| 232 | PDPN    |
| 233 | PECAM1  |
| 234 | PFN1    |
| 235 | PGM2    |
| 236 | PHLDA2  |
| 237 | PLAT    |
| 238 | PLAU    |
| 239 | PLAUR   |

|     |         |
|-----|---------|
| 240 | PLBD1   |
| 241 | PLEK2   |
| 242 | PLEKHG2 |
| 243 | PLIN2   |
| 244 | PLK3    |
| 245 | PLOD1   |
| 246 | PLOD3   |
| 247 | PLP2    |
| 248 | PLSCR1  |
| 249 | PLVAP   |
| 250 | PMM2    |
| 251 | POSTN   |
| 252 | POTEF   |
| 253 | PPP1R3B |
| 254 | PRF1    |
| 255 | PROS1   |
| 256 | PRSS23  |
| 257 | PTGIR   |
| 258 | PTTG1   |
| 259 | PTX3    |
| 260 | PYGL    |
| 261 | RAB27A  |

|     |          |
|-----|----------|
| 262 | RAB32    |
| 263 | RAB42    |
| 264 | RBMS1    |
| 265 | RDH10    |
| 266 | REXO2    |
| 267 | RGS16    |
| 268 | RGS3     |
| 269 | RHOJ     |
| 270 | RIPK1    |
| 271 | RRM2     |
| 272 | RUNX1    |
| 273 | S100A11  |
| 274 | S100A4   |
| 275 | SAT1     |
| 276 | SBNO2    |
| 277 | SDC1     |
| 278 | SEC24D   |
| 279 | SECTM1   |
| 280 | SEMA3F   |
| 281 | SERPINB8 |
| 282 | SERPINE1 |
| 283 | SERPINH1 |

|     |          |
|-----|----------|
| 284 | SERTAD1  |
| 285 | SH2B3    |
| 286 | SHC1     |
| 287 | SHCBP1   |
| 288 | SHISA5   |
| 289 | SKA1     |
| 290 | SLC10A3  |
| 291 | SLC16A3  |
| 292 | SLC25A24 |
| 293 | SLC26A2  |
| 294 | SLC30A7  |
| 295 | SLC43A3  |
| 296 | SMAGP    |
| 297 | SMC4     |
| 298 | SOCS3    |
| 299 | SOD2     |
| 300 | SPOCD1   |
| 301 | SPON2    |
| 302 | SPRY1    |
| 303 | SRPX2    |
| 304 | STEAP3   |
| 305 | STK40    |

|     |           |
|-----|-----------|
| 306 | SUSD2     |
| 307 | TACC3     |
| 308 | TAGLN     |
| 309 | TAGLN2    |
| 310 | TEAD4     |
| 311 | TES       |
| 312 | TGFB1I1   |
| 313 | TGFBI     |
| 314 | TGIF1     |
| 315 | THBD      |
| 316 | THBS1     |
| 317 | TIMP1     |
| 318 | TK1       |
| 319 | TM4SF1    |
| 320 | TMEM45A   |
| 321 | TMSB10    |
| 322 | TMSB4X    |
| 323 | TNC       |
| 324 | TNFAIP6   |
| 325 | TNFAIP8   |
| 326 | TNFRSF11B |
| 327 | TNFRSF12A |

|     |          |
|-----|----------|
| 328 | TNFRSF1A |
| 329 | TPM4     |
| 330 | TRAM2    |
| 331 | TREM1    |
| 332 | TUBA1C   |
| 333 | TUBB6    |
| 334 | TXNDC5   |
| 335 | UGCG     |
| 336 | VASP     |
| 337 | VDR      |
| 338 | VEGFA    |
| 339 | VIM      |
| 340 | VKORC1   |
| 341 | WDR1     |
| 342 | WEE1     |
| 343 | ZWILCH   |
| 344 | ZYX      |
