# Supplementary material for: Clinical Characterization and Prognostic Value of TPM4 and Its Correlation with Epithelial–Mesenchymal Transition in Glioma
Source: MDPI journal article supplement (doi:10.3390/brainsci12091120), 2022-08-24
Supplement: s1 [file s1]

**Supplemental Table 1 Patient characteristics in TCGA RNA-seq and CGGA\_301 microarray data.**

| <b>Characteristics</b>          | <b>TCGA (n=697)</b> | <b>CGGA (n=301)</b> |
|---------------------------------|---------------------|---------------------|
| <b>Gender</b>                   |                     |                     |
| male                            | 370                 | 180                 |
| female                          | 271                 | 121                 |
| NA                              | 56                  | 0                   |
| <b>Age (year)</b>               | 47 ± 15             | 42 ± 12             |
| <b>TCGA Subtype</b>             |                     |                     |
| Classical                       | 90                  | 23                  |
| Mesenchymal                     | 104                 | 111                 |
| Proneural                       | 248                 | 86                  |
| Neural                          | 115                 | 81                  |
| NA                              | 140                 | 0                   |
| <b>WHO grade</b>                |                     |                     |
| Grade II                        | 226                 | 122                 |
| Grade III                       | 249                 | 51                  |
| Grade IV                        | 167                 | 128                 |
| NA                              | 55                  | 0                   |
| <b>KPS</b>                      | 84 ± 14             | NA                  |
| <b>IDH mutation status</b>      |                     |                     |
| Mutation                        | 442                 | 134                 |
| Wildtype                        | 245                 | 165                 |
| NA                              | 10                  | 2                   |
| <b>1p/19q Codeletion status</b> |                     |                     |
| Codeletion                      | 181                 | 16                  |
| Non-codeletion                  | 491                 | 76                  |
| NA                              | 25                  | 209                 |
| <b>MGMT promoter status</b>     |                     |                     |
| Methylated                      | 461                 | 99                  |
| Unmethylated                    | 162                 | 187                 |
| NA                              | 74                  | 15                  |

NA: Not Available; KPS: Karnofsky Performance Score; MGMT: O<sup>6</sup>-

Methylguanine Methyltransferase
